# Supplementary material for: Selection of 51 predictors from 13,782 candidate multimodal features using machine learning improves coronary artery disease prediction
Source: PubMed Central journal article supplement — Patterns (N Y). 2021 Oct 4;2(12):100364. doi: 10.1016/j.patter.2021.100364 (PMC8672148; doi:10.1016/j.patter.2021.100364), 2021-10-04

**Patterns, Volume 2**

**Supplemental information**

**Selection of 51 predictors from 13,782 candidate  
multimodal features using machine learning  
improves coronary artery disease prediction**

**Saaket Agrawal, Marcus D.R. Klarqvist, Connor Emdin, Aniruddh P. Patel, Manish D. Paranjpe, Patrick T. Ellinor, Anthony Philippakis, Kenney Ng, Puneet Batra, and Amit V. Khera**

## TABLE OF CONTENTS

**Table S1** UK Biobank codes used for excluding individuals on the basis of prevalent disease

**Table S2** Breakdown of individuals who were missing data for continuous traits in the UK Biobank

**Table S3** Breakdown of individuals who were missing data from nurse interview questions in the UK Biobank

**Table S4** Baseline characteristics in UK Biobank stratified by inclusion status

**Table S5** UK Biobank codes included in Coronary Artery Disease (CAD) Outcome Definition

**Table S9** C-statistics for ML4H<sub>EN-COX</sub> and clinical risk algorithms in the development cohort.

**Table S11** C-statistics for XGBoost, SimpleCox51, and SimpleCox20

**Table S12** Categorical reclassification indices for XGBoost, SimpleCox51, and SimpleCox20

**Figure S1** Correlation plot of the 51 predictors selected by ML4H<sub>EN-COX</sub>.

**Figure S2** Principal components of genetic ancestry for the analyzed cohort

**Figure S3** Calibration plots for ML4H<sub>EN-COX</sub> in the development and holdout cohorts.

**Figure S4** Calibration plots for Framingham risk score and re-calibrated Framingham risk score in the development cohort.

**Figure S5** Calibration plots for Pooled Cohort Equations and re-calibrated Pooled Cohort Equations in the development cohort.

**Figure S6** Calibration plots for QRISK3 and re-calibrated QRISK3 in the development cohort.

**Figure S7** Calibration plots for XGBoost, SimpleCox51, and SimpleCox20 in the holdout cohort.

**Figure S8** Distribution of predicted 10-year risk of CAD for ML4H<sub>EN-COX</sub>, FRS, PCE, QRISK3, SimpleCox51, and XGBoost in the holdout cohort.

## SUPPLEMENTARY TABLES

**Table S1** UK Biobank codes used for excluding individuals on the basis of prevalent disease

| UK Biobank Field ID | Description                                     | Codings                                                                                                                                                                                                                                                                                                                                                                                                                                                                                                                                                                                                                                                                                                                                                                                                         |
|---------------------|-------------------------------------------------|-----------------------------------------------------------------------------------------------------------------------------------------------------------------------------------------------------------------------------------------------------------------------------------------------------------------------------------------------------------------------------------------------------------------------------------------------------------------------------------------------------------------------------------------------------------------------------------------------------------------------------------------------------------------------------------------------------------------------------------------------------------------------------------------------------------------|
| 6150                | Vascular/heart problems diagnosed by doctor     | 1, 2                                                                                                                                                                                                                                                                                                                                                                                                                                                                                                                                                                                                                                                                                                                                                                                                            |
| 20002               | Non-cancer illness code, self-reported          | 1088, 1087, 1067, 1074, 1075, 1079, 1076, 1588, 1491, 1583, 1081, 1086, 1082                                                                                                                                                                                                                                                                                                                                                                                                                                                                                                                                                                                                                                                                                                                                    |
| 20004               | Operation code                                  | 1440, 1102, 1108, 1109, 1105, 1110, 1070, 1095, 1523, 1551, 1550, 1096                                                                                                                                                                                                                                                                                                                                                                                                                                                                                                                                                                                                                                                                                                                                          |
| 40001               | Underlying (primary) cause of death: ICD10      | I70.0, I70.00, I70.01, I70.2, I70.20, I70.21, I70.8, I70.80, I70.9, I70.90, I73.8, I73.9, I20, I20.0, I20.1, I20.8, I20.9, I21, I21.0, I21.1, I21.2, I21.3, I21.4, I21.9, I22, I22.0, I22.1, I22.8, I22.9, I23, I23.0, I23.1, I23.2, I23.3, I23.4, I23.5, I23.6, I23.8, I24, I24.0, I24.1, I24.8, I24.9, I25.1, I25.2, I25.5, I25.6, I25.8, I25.9                                                                                                                                                                                                                                                                                                                                                                                                                                                               |
| 40002               | Contributory (secondary) causes of death: ICD10 | I70.0, I70.00, I70.01, I70.2, I70.20, I70.21, I70.8, I70.80, I70.9, I70.90, I73.8, I73.9, I20, I20.0, I20.1, I20.8, I20.9, I21, I21.0, I21.1, I21.2, I21.3, I21.4, I21.9, I22, I22.0, I22.1, I22.8, I22.9, I23, I23.0, I23.1, I23.2, I23.3, I23.4, I23.5, I23.6, I23.8, I24, I24.0, I24.1, I24.8, I24.9, I25.1, I25.2, I25.5, I25.6, I25.8, I25.9                                                                                                                                                                                                                                                                                                                                                                                                                                                               |
| 41200               | Operative procedures - main OPCS4               | X09.3, X09.4, X09.5, L21.6, L51.3, L51.6, L51.8, L52.1, L52.2, L54.1, L54.4, L54.8, L59.1, L59.2, L59.3, L59.4, L59.5, L59.6, L59.7, L59.8, L60.1, L60.2, L63.1, L63.5, L63.9, L66.7, K40, K40.1, K40.2, K40.3, K40.4, K40.8, K40.9, K41, K41.1, K41.2, K41.3, K41.4, K41.8, K41.9, K42, K42.1, K42.2, K42.3, K42.4, K42.8, K42.9, K43, K43.1, K43.2, K43.3, K43.4, K43.8, K43.9, K44, K44.1, K44.2, K44.8, K44.9, K45.1, K45.2, K45.3, K45.4, K45.5, K45.6, K45.8, K45.9, K46, K46.1, K46.2, K46.3, K46.4, K46.5, K46.8, K46.9, K49.1, K49.2, K49.3, K49.4, K49.8, K49.9, K50.1, K50.2, K50.4, K75.1, K75.2, K75.3, K75.4, K75.8, K75.9                                                                                                                                                                        |
| 41202               | Diagnoses - main ICD10                          | I70.0, I70.00, I70.01, I70.2, I70.20, I70.21, I70.8, I70.80, I70.9, I70.90, I73.8, I73.9, I20, I20.0, I20.1, I20.8, I20.9, I21, I21.0, I21.1, I21.2, I21.3, I21.4, I21.9, I22, I22.0, I22.1, I22.8, I22.9, I23, I23.0, I23.1, I23.2, I23.3, I23.4, I23.5, I23.6, I23.8, I24, I24.0, I24.1, I24.8, I24.9, I25.1, I25.2, I25.5, I25.6, I25.8, I25.9                                                                                                                                                                                                                                                                                                                                                                                                                                                               |
| 41203               | Diagnoses - main ICD9                           | 4400, 4402, 4438, 4439, 410, 4109, 411, 4119, 412, 4129, 413, 4139, 4140, 4148, 4149                                                                                                                                                                                                                                                                                                                                                                                                                                                                                                                                                                                                                                                                                                                            |
| 41204               | Diagnoses - secondary ICD10                     | I70.0, I70.00, I70.01, I70.2, I70.20, I70.21, I70.8, I70.80, I70.9, I70.90, I73.8, I73.9, I20, I20.0, I20.1, I20.8, I20.9, I21, I21.0, I21.1, I21.2, I21.3, I21.4, I21.9, I22, I22.0, I22.1, I22.8, I22.9, I23, I23.0, I23.1, I23.2, I23.3, I23.4, I23.5, I23.6, I23.8, I24, I24.0, I24.1, I24.8, I24.9, I25.1, I25.2, I25.5, I25.6, I25.8, I25.9                                                                                                                                                                                                                                                                                                                                                                                                                                                               |
| 41205               | Diagnoses - secondary ICD9                      | 4400, 4402, 4438, 4439, 410, 4109, 411, 4119, 412, 4129, 413, 4139, 4140, 4148, 4149                                                                                                                                                                                                                                                                                                                                                                                                                                                                                                                                                                                                                                                                                                                            |
| 41210               | Operative procedures - secondary OPCS4          | X09.3, X09.4, X09.5, L21.6, L51.3, L51.6, L51.8, L52.1, L52.2, L54.1, L54.4, L54.8, L59.1, L59.2, L59.3, L59.4, L59.5, L59.6, L59.7, L59.8, L60.1, L60.2, L63.1, L63.5, L63.9, L66.7, K40, K40.1, K40.2, K40.3, K40.4, K40.8, K40.9, K41, K41.1, K41.2, K41.3, K41.4, K41.8, K41.9, K42, K42.1, K42.2, K42.3, K42.4, K42.8, K42.9, K43, K43.1, K43.2, K43.3, K43.4, K43.8, K43.9, K44, K44.1, K44.2, K44.8, K44.9, K45.1, K45.2, K45.3, K45.4, K45.5, K45.6, K45.8, K45.9, K46, K46.1, K46.2, K46.3, K46.4, K46.5, K46.8, K46.9, K49.1, K49.2, K49.3, K49.4, K49.8, K49.9, K50.1, K50.2, K50.4, K75.1, K75.2, K75.3, K75.4, K75.8, K75.9                                                                                                                                                                        |
| 41270               | Diagnoses - ICD10                               | I700, I702, I708, I709, I738, I739, I701, I740, I741, I742, I743, I744, I745, I748, I749, I200, I201, I208, I209, I210, I211, I212, I213, I214, I219, I220, I221, I228, I229, I231, I232, I236, I238, I240, I241, I248, I249, I251, I252, I255, I256, I258, I259, I250, I510, I511, I512, R931, T825, T827, T828, T829, Z034, Z951, Z955, Z958, Z959, I110, I130, I132, I420, I421, I422, I425, I428, I429, I500, I501, I509, I426, I427, I430, I431, I438, I517, J81, I600, I601, I602, I603, I604, I605, I606, I607, I608, I609, I610, I611, I612, I613, I614, I615, I616, I618, I619, I630, I631, I632, I633, I634, I635, I636, I638, I639, I64, G450, G451, G458, G459, G461, G462, G463, G464, G465, G466, G467, G468, I629, I650, I651, I652, I653, I658, I659, I660, I662, I663, I664, I668, I669, I672, |

|       |                              |                                                                                                                                                                                                                                                                                                                                                                                                                                                                                                                                                                                                                                                                                                                                                                                                                                                                                                                                                                                                                                                                        |
|-------|------------------------------|------------------------------------------------------------------------------------------------------------------------------------------------------------------------------------------------------------------------------------------------------------------------------------------------------------------------------------------------------------------------------------------------------------------------------------------------------------------------------------------------------------------------------------------------------------------------------------------------------------------------------------------------------------------------------------------------------------------------------------------------------------------------------------------------------------------------------------------------------------------------------------------------------------------------------------------------------------------------------------------------------------------------------------------------------------------------|
|       |                              | I679, I690, I691, I692, I693, I694, I698, I460, I469, I490, R071, R072, R073, R074, R943                                                                                                                                                                                                                                                                                                                                                                                                                                                                                                                                                                                                                                                                                                                                                                                                                                                                                                                                                                               |
| 41272 | Operative procedures - OPCS4 | L216, L518, L541, L544, L548, L591, L592, L593, L594, L595, L596, L597, L598, L601, L602, L631, L635, L639, X094, K471, L161, L162, L201, L204, L205, L206, L208, L211, L212, L213, L218, L251, L253, L261, L262, L263, L265, L266, L267, L291, L293, L294, L295, L303, L311, L314, L351, L353, L371, L378, L381, L382, L383, L384, L388, L391, L392, L393, L395, L398, L412, L419, L421, L422, L423, L428, L431, L432, L433, L435, L438, L439, L451, L452, L463, L464, L468, L471, L472, L474, L503, L505, L506, L508, L511, L512, L513, L514, L515, L516, L519, L521, L522, L528, L531, L532, L542, L549, L581, L582, L583, L584, L585, L599, L603, L604, L608, L621, L622, L632, L633, L682, L711, L761, L762, L763, L765, L766, L768, L769, L895, L896, L899, K401, K402, K403, K404, K408, K409, K411, K412, K413, K414, K422, K424, K431, K433, K439, K441, K442, K448, K449, K451, K452, K453, K454, K455, K456, K458, K459, K461, K462, K463, K464, K469, K491, K492, K493, K494, K498, K499, K501, K502, K504, K751, K752, K753, K754, K758, K759, Y731, Y732 |
| 42007 | Source of stroke report      | 0, 1, 2                                                                                                                                                                                                                                                                                                                                                                                                                                                                                                                                                                                                                                                                                                                                                                                                                                                                                                                                                                                                                                                                |

**Table S2** Breakdown of individuals who were missing data for continuous traits in the UK Biobank

| <b>UK Biobank Field ID</b> | <b>Field</b>                                    | <b>Participants</b> | <b>Missing</b> | <b>Missing (%)</b> |
|----------------------------|-------------------------------------------------|---------------------|----------------|--------------------|
| 31                         | Sex                                             | 502,504             | 0              | 0.00%              |
| 48                         | Waist circumference                             | 502,504             | 2,160          | 0.43%              |
| 49                         | Hip circumference                               | 502,504             | 2,219          | 0.44%              |
| 50                         | Standing height                                 | 502,504             | 2,539          | 0.51%              |
| 21001                      | Body mass index (BMI)                           | 502,504             | 3,105          | 0.62%              |
| 21002                      | Weight                                          | 502,504             | 2,774          | 0.55%              |
| 21022                      | Age at recruitment                              | 502,504             | 0              | 0.00%              |
| 102                        | Pulse rate, automated reading                   | 502,504             | 27,375         | 5.45%              |
| 4079                       | Diastolic blood pressure, automated reading     | 502,504             | 30,113         | 5.99%              |
| 4080                       | Systolic blood pressure, automated reading      | 502,504             | 30,118         | 5.99%              |
| 30000                      | White blood cell (leukocyte) count              | 502,504             | 24,336         | 4.84%              |
| 30010                      | Red blood cell (erythrocyte) count              | 502,504             | 24,331         | 4.84%              |
| 30020                      | Haemoglobin concentration                       | 502,504             | 24,331         | 4.84%              |
| 30030                      | Haematocrit percentage                          | 502,504             | 24,331         | 4.84%              |
| 30040                      | Mean corpuscular volume                         | 502,504             | 24,333         | 4.84%              |
| 30050                      | Mean corpuscular haemoglobin                    | 502,504             | 24,334         | 4.84%              |
| 30060                      | Mean corpuscular haemoglobin concentration      | 502,504             | 24,338         | 4.84%              |
| 30070                      | Red blood cell (erythrocyte) distribution width | 502,504             | 24,333         | 4.84%              |
| 30080                      | Platelet count                                  | 502,504             | 24,334         | 4.84%              |
| 30090                      | Platelet crit                                   | 502,504             | 24,338         | 4.84%              |
| 30100                      | Mean platelet (thrombocyte) volume              | 502,504             | 24,339         | 4.84%              |
| 30110                      | Platelet distribution width                     | 502,504             | 24,339         | 4.84%              |

|       |                                            |         |        |        |
|-------|--------------------------------------------|---------|--------|--------|
| 30120 | Lymphocyte count                           | 502,504 | 25,220 | 5.02%  |
| 30130 | Monocyte count                             | 502,504 | 25,220 | 5.02%  |
| 30140 | Neutrophill count                          | 502,504 | 25,220 | 5.02%  |
| 30150 | Eosinophill count                          | 502,504 | 25,220 | 5.02%  |
| 30160 | Basophill count                            | 502,504 | 25,220 | 5.02%  |
| 30170 | Nucleated red blood cell count             | 502,504 | 25,231 | 5.02%  |
| 30180 | Lymphocyte percentage                      | 502,504 | 25,214 | 5.02%  |
| 30190 | Monocyte percentage                        | 502,504 | 25,214 | 5.02%  |
| 30200 | Neutrophill percentage                     | 502,504 | 25,214 | 5.02%  |
| 30210 | Eosinophill percentage                     | 502,504 | 25,214 | 5.02%  |
| 30220 | Basophill percentage                       | 502,504 | 25,214 | 5.02%  |
| 30230 | Nucleated red blood cell percentage        | 502,504 | 25,235 | 5.02%  |
| 30240 | Reticulocyte percentage                    | 502,504 | 32,648 | 6.50%  |
| 30250 | Reticulocyte count                         | 502,504 | 32,648 | 6.50%  |
| 30260 | Mean reticulocyte volume                   | 502,504 | 32,649 | 6.50%  |
| 30270 | Mean sphered cell volume                   | 502,504 | 32,647 | 6.50%  |
| 30280 | Immature reticulocyte fraction             | 502,504 | 32,649 | 6.50%  |
| 30290 | High light scatter reticulocyte percentage | 502,504 | 32,647 | 6.50%  |
| 30300 | High light scatter reticulocyte count      | 502,504 | 32,648 | 6.50%  |
| N/A   | Black Ethnicity                            | 502,504 | 97,020 | 19.31% |
| N/A   | White Ethnicity                            | 502,504 | 97,020 | 19.31% |
| N/A   | Normalized polygenic risk score            | 502,504 | 97,020 | 19.31% |
| N/A   | Sotutheast Asian Ethnicity                 | 502,504 | 97,020 | 19.31% |
| N/A   | PRS principle component 4                  | 502,504 | 97,020 | 19.31% |
| N/A   | PRS principle component 3                  | 502,504 | 97,020 | 19.31% |
| N/A   | PRS principle component 2                  | 502,504 | 97,020 | 19.31% |
| N/A   | PRS principle component 1                  | 502,504 | 97,020 | 19.31% |
| N/A   | East Asian Ethnicity                       | 502,504 | 97,020 | 19.31% |
| 30600 | Albumin                                    | 502,504 | 72,429 | 14.41% |

|       |                                           |         |        |        |
|-------|-------------------------------------------|---------|--------|--------|
| 30610 | Alkaline phosphatase                      | 502,504 | 32,902 | 6.55%  |
| 30620 | Alanine aminotransferase                  | 502,504 | 33,103 | 6.59%  |
| 30630 | Apolipoprotein A                          | 502,504 | 74,994 | 14.92% |
| 30640 | Apolipoprotein B                          | 502,504 | 35,298 | 7.02%  |
| 30650 | Aspartate aminotransferase                | 502,504 | 34,708 | 6.91%  |
| 30670 | Urea                                      | 502,504 | 33,233 | 6.61%  |
| 30680 | Calcium                                   | 502,504 | 72,572 | 14.44% |
| 30690 | Cholesterol                               | 502,504 | 32,915 | 6.55%  |
| 30700 | Creatinine                                | 502,504 | 33,147 | 6.60%  |
| 30710 | C-reactive protein                        | 502,504 | 33,936 | 6.75%  |
| 30720 | Cystatin C                                | 502,504 | 32,946 | 6.56%  |
| 30730 | Gamma glutamyltransferase                 | 502,504 | 33,162 | 6.60%  |
| 30740 | Glucose                                   | 502,504 | 72,937 | 14.51% |
| 30750 | Glycated haemoglobin (HbA1c)              | 502,504 | 36,000 | 7.16%  |
| 30760 | HDL cholesterol                           | 502,504 | 72,633 | 14.45% |
| 30770 | IGF-1                                     | 502,504 | 35,464 | 7.06%  |
| 30780 | LDL direct                                | 502,504 | 33,798 | 6.73%  |
| 30810 | Phosphate                                 | 502,504 | 73,253 | 14.58% |
| 30830 | SHBG                                      | 502,504 | 76,658 | 15.26% |
| 30840 | Total bilirubin                           | 502,504 | 34,944 | 6.95%  |
| 30850 | Testosterone                              | 502,504 | 77,297 | 15.38% |
| 30860 | Total protein                             | 502,504 | 72,900 | 14.51% |
| 30870 | Triglycerides                             | 502,504 | 33,290 | 6.62%  |
| 30880 | Urate                                     | 502,504 | 33,479 | 6.66%  |
| 30890 | Vitamin D                                 | 502,504 | 54,154 | 10.78% |
| N/A   | Lipoprotein A                             | 502,504 | 43,618 | 8.68%  |
| N/A   | Weekly American standardized drinks       | 502,504 | 0      | 0.00%  |
| 189   | Townsend deprivation index at recruitment | 502,504 | 623    | 0.12%  |

**Table S3** Breakdown of individuals who were missing data from nurse interview questions in the UK Biobank

| Field                                                                                                                                                      | UK Biobank Field ID | N       | Responses (N) | Prefer not to answer |       | Missing |
|------------------------------------------------------------------------------------------------------------------------------------------------------------|---------------------|---------|---------------|----------------------|-------|---------|
|                                                                                                                                                            |                     |         |               | N                    | %     | %       |
| Illnesses of father                                                                                                                                        | 20107               | 502,504 | 487,770       | 1,102                | 0.23% | 3.25%   |
| Illnesses of mother                                                                                                                                        | 20110               | 502,504 | 492,908       | 941                  | 0.19% | 2.14%   |
| Illnesses of siblings                                                                                                                                      | 20111               | 502,504 | 433,903       | 869                  | 0.20% | 16.01%  |
| Medication for cholesterol, blood pressure or diabetes (males); Medication for cholesterol, blood pressure, diabetes, or take exogenous hormones (females) | 6177, 6153          | 502,504 | 497,788       | 638                  | 0.13% | 1.08%   |
| Smoking status                                                                                                                                             | 20116               | 502,504 | 501,613       | 2,057                | 0.41% | 0.59%   |
| Weight change compared with 1 year ago                                                                                                                     | 2306                | 502,504 | 501,584       | 424                  | 0.08% | 0.27%   |
| Chest pain or discomfort                                                                                                                                   | 2335                | 502,504 | 501,581       | 706                  | 0.14% | 0.32%   |
| Vascular/heart problems diagnosed by doctor                                                                                                                | 6150                | 502,504 | 501,575       | 1,294                | 0.26% | 0.44%   |
| Blood clot, DVT, bronchitis, emphysema, asthma, rhinitis, eczema, allergy diagnosed by doctor                                                              | 6152                | 502,504 | 501,573       | 1,210                | 0.24% | 0.43%   |
| Diabetes diagnosed by doctor                                                                                                                               | 2443                | 502,504 | 501,573       | 404                  | 0.08% | 0.27%   |
| Average total household income before tax                                                                                                                  | 738                 | 502,504 | 500,247       | 49,846               | 9.96% | 10.42%  |



**Table S4** Baseline characteristics in UK Biobank stratified by inclusion status

|                                                      | Excluded<br>(N = 329,230) | Included (Development +<br>Holdout)<br>(N = 173,274) |
|------------------------------------------------------|---------------------------|------------------------------------------------------|
| Age (years)                                          | 57.5 (8.1)                | 56.2 (8.1)                                           |
| Men                                                  | 140,620 (42.7%)           | 88,502 (51.1%)                                       |
| <b>Ethnicity Group</b>                               |                           |                                                      |
| White                                                | 306,993 (93.2%)           | 165,702 (95.6%)                                      |
| Black                                                | 6,662 (2.0%)              | 2,444 (1.4%)                                         |
| East Asian                                           | 2,878 (0.9%)              | 1,385 (0.8%)                                         |
| South Asian                                          | 6,008 (1.8%)              | 2,016 (1.2%)                                         |
| Other                                                | 6,689 (2.0%)              | 1,727 (1.0%)                                         |
| Current smoker                                       | 34,878 (10.7%)            | 18,105 (10.4%)                                       |
| Diabetes                                             | 19,645 (6.0%)             | 8,203 (4.7%)                                         |
| Cholesterol (mg/dL)                                  | 221.1 (47.5)              | 217.5 (37.7)                                         |
| HDL-C (mg/dL)                                        | 56.3 (15.3)               | 55.4 (13.9)                                          |
| LDL-C (mg/dL)                                        | 137.9 (35.9)              | 136.2 (29.2)                                         |
| SBP (mmHg)                                           | 138.1 (18.8)              | 137.5 (18.4)                                         |
| Antihypertensive                                     | 76,112 (23.1%)            | 32,601 (18.8%)                                       |
| CAD Polygenic Risk Score<br>(CAD PRS)                | 0.02 (1.00)               | -0.03 (0.99)                                         |
| Incident CAD events over<br>median 11-year follow-up | 11,382 (3.7%)             | 5,140 (3.0%)                                         |
| <b>Predicted 10 year risk (%)</b>                    |                           |                                                      |
| Framingham risk score (FRS)                          | 6.9 (6.4)                 | 6.9 (6.4)                                            |
| Pooled cohort equations (PCE)                        | 8.8 (7.9)                 | 8.3 (7.7)                                            |
| QRISK3-2017 (QRISK3)                                 | 11.1 (9.3)                | 10.0 (8.4)                                           |

**Table S5** UK Biobank Codes included in Coronary Artery Disease (CAD) Outcome Definition

| ICD-10 (41202, 41204) | ICD-10 Cause of Death (40001, 40002) | ICD-9 (41203, 41205) | OPCS-4 (41200, 41210) |
|-----------------------|--------------------------------------|----------------------|-----------------------|
| I21                   | I21                                  | 410                  | K40                   |
| I22                   | I22                                  | 411                  | K41                   |
| I23                   | I23                                  | 412                  | K42                   |
| I24                   | I24                                  |                      | K43                   |
| I25.2                 | I25.2                                |                      | K44                   |
|                       |                                      |                      | K45                   |
|                       |                                      |                      | K46                   |
|                       |                                      |                      | K49                   |
|                       |                                      |                      | K50                   |
|                       |                                      |                      | K75                   |

**Table S9** C-statistics for ML4H<sub>EN-COX</sub> and clinical risk algorithms in the **development** cohort.

| <b>Model<br/>(C-statistic)</b> | <b>Entire<br/>development<br/>(n = 138,619)</b> | <b>Male<br/>(n = 70,896)</b> | <b>Female<br/>(n = 67,723)</b> | <b>Age &lt; 55<br/>(n = 59,728)</b> | <b>Age &gt;= 55<br/>(n = 78,891)</b> |
|--------------------------------|-------------------------------------------------|------------------------------|--------------------------------|-------------------------------------|--------------------------------------|
| ML4H <sub>EN-COX</sub>         | 0.790 (0.783,<br>0.797)                         | 0.741 (0.733,<br>0.749)      | 0.769 (0.753,<br>0.784)        | 0.808 (0.793,<br>0.823)             | 0.747 (0.739,<br>0.755)              |
| FRS                            | 0.751 (0.744,<br>0.758)                         | 0.680 (0.671,<br>0.689)      | 0.741 (0.725,<br>0.757)        | 0.770 (0.753,<br>0.784)             | 0.703 (0.694,<br>0.711)              |
| PCE                            | 0.750 (0.743,<br>0.757)                         | 0.680 (0.671,<br>0.689)      | 0.739 (0.723,<br>0.754)        | 0.773 (0.755,<br>0.787)             | 0.700 (0.691,<br>0.709)              |
| QRISK3                         | 0.756 (0.749,<br>0.764)                         | 0.688 (0.679,<br>0.697)      | 0.739 (0.724,<br>0.757)        | 0.775 (0.759,<br>0.789)             | 0.708 (0.699,<br>0.718)              |

ML4HEN-COX performs similarly in the development cohort as in the holdout cohort (**Table 3**), suggesting that no overfitting has occurred. Bootstrapped 95% confidence intervals indicated in parentheses.

**Table S11** C-statistics for XGBoost, SimpleCox51, and SimpleCox20

| <b>Model<br/>(C-statistic)</b> | <b>Entire<br/>holdout<br/>(n = 34,655)</b> | <b>Men<br/>(n = 17,606)</b>          | <b>Women<br/>(n = 17,049)</b>        | <b>Age &lt; 55<br/>(n = 15,134)</b>  | <b>Age &gt;= 55<br/>(n = 19,521)</b> |
|--------------------------------|--------------------------------------------|--------------------------------------|--------------------------------------|--------------------------------------|--------------------------------------|
| ML4H <sub>EN-COX</sub>         | 0.796<br>(0.784, 0.809)<br>ref             | 0.751<br>(0.735, 0.767)<br>ref       | 0.780<br>(0.747, 0.811)<br>ref       | 0.825<br>(0.799, 0.850)<br>ref       | 0.755<br>(0.737, 0.771)<br>ref       |
| XGBoost                        | 0.797<br>(0.784, 0.810)<br>p = 0.847       | 0.752<br>(0.736, 0.770)<br>p = 0.976 | 0.784<br>(0.755, 0.813)<br>p = 0.495 | 0.832<br>(0.805, 0.855)<br>p = 0.189 | 0.754<br>(0.736, 0.770)<br>p = 0.632 |
| SimpleCox51                    | 0.797<br>(0.784, 0.811)<br>p = 0.350       | 0.753<br>(0.736, 0.769)<br>p = 0.637 | 0.785<br>(0.753, 0.816)<br>p = 0.041 | 0.827<br>(0.800, 0.853)<br>p = 0.383 | 0.756<br>(0.739, 0.772)<br>p = 0.802 |
| SimpleCox20                    | 0.794<br>(0.781, 0.807)<br>p = 0.171       | 0.749<br>(0.732, 0.764)<br>p = 0.303 | 0.777<br>(0.745, 0.808)<br>p = 0.411 | 0.820<br>(0.793, 0.846)<br>p = 0.124 | 0.753<br>(0.736, 0.770)<br>p = 0.422 |

XGBoost, SimpleCox51, and SimpleCox20 have similar discriminatory performance as ML4H<sub>EN-COX</sub> across all studied subgroups in the holdout cohort. Bootstrapped 95% confidence intervals indicated in parentheses. P values listed below each C-statistic correspond to DeLong's test comparing each C-statistic to reference (ML4H<sub>EN-COX</sub>).

**Table S12** Categorical reclassification indices for XGBoost, SimpleCox51, and SimpleCox20

| Categorical NRI cutoff                                   | Comparator model |                   |                  |
|----------------------------------------------------------|------------------|-------------------|------------------|
|                                                          | FRS              | PCE               | QRISK3           |
| <b>ML4H<sub>EN-COX</sub></b>                             |                  |                   |                  |
| 2.5%                                                     | 6.0% (3.5-8.6%)  | 6.6% (4.1-9.1%)   | 5.8% (3.3-8.3%)  |
| 5.0%                                                     | 6.1% (3.1-9.1%)  | 8.2% (5.1-11.2%)  | 7.5% (4.6-10.5%) |
| <b>XGBoost</b>                                           |                  |                   |                  |
| 2.5%                                                     | 5.9% (3.3-8.5%)  | 6.4% (3.8-9.0%)   | 5.6% (3.1-8.2%)  |
| 5.0%                                                     | 7.9% (5.0-10.9%) | 10.0% (6.9-13.1%) | 9.3% (6.4-12.2%) |
| <b>SimpleCox51</b>                                       |                  |                   |                  |
| 2.5%                                                     | 6.6% (4.0-9.2%)  | 7.1% (4.6-9.7%)   | 6.3% (3.8-8.9%)  |
| 5.0%                                                     | 6.9% (3.9-9.9%)  | 9.0% (5.9-12.0%)  | 8.2% (5.2-11.2%) |
| <b>SimpleCox20</b>                                       |                  |                   |                  |
| 2.5%                                                     | 5.8% (3.2-8.4%)  | 6.3% (3.8-8.9%)   | 5.5% (3.0-8.1%)  |
| 5.0%                                                     | 6.8% (3.7-9.8%)  | 8.8% (5.7-11.9%)  | 8.2% (5.2-11.2%) |
| <b>ML4H<sub>EN-COX</sub> (unknown GPS<sub>CAD</sub>)</b> |                  |                   |                  |
| 2.5%                                                     | 2.1% (0.0-4.3%)  | 2.7% (0.7-4.7%)   | 1.8% (0.0-3.9%)  |
| 5.0%                                                     | 2.4% (0.0-5.2%)  | 4.5% (1.9-7.1%)   | 3.9% (1.4-6.4%)  |

Note that the ML4H<sub>EN-COX</sub> results are identical to those of Table 4 in the main text and are reproduced here for comparison with alternate models XGBoost, SimpleCox51, and SimpleCox20.

An additional sensitivity analysis (ML4H<sub>EN-COX</sub> (unknown GPS<sub>CAD</sub>)) is shown to simulate the situation where GPS<sub>CAD</sub> is unknown and the mean value is assumed.

**FIGURE S1** Correlation plot of the 51 predictors selected by ML4H<sub>EN-COX</sub>.

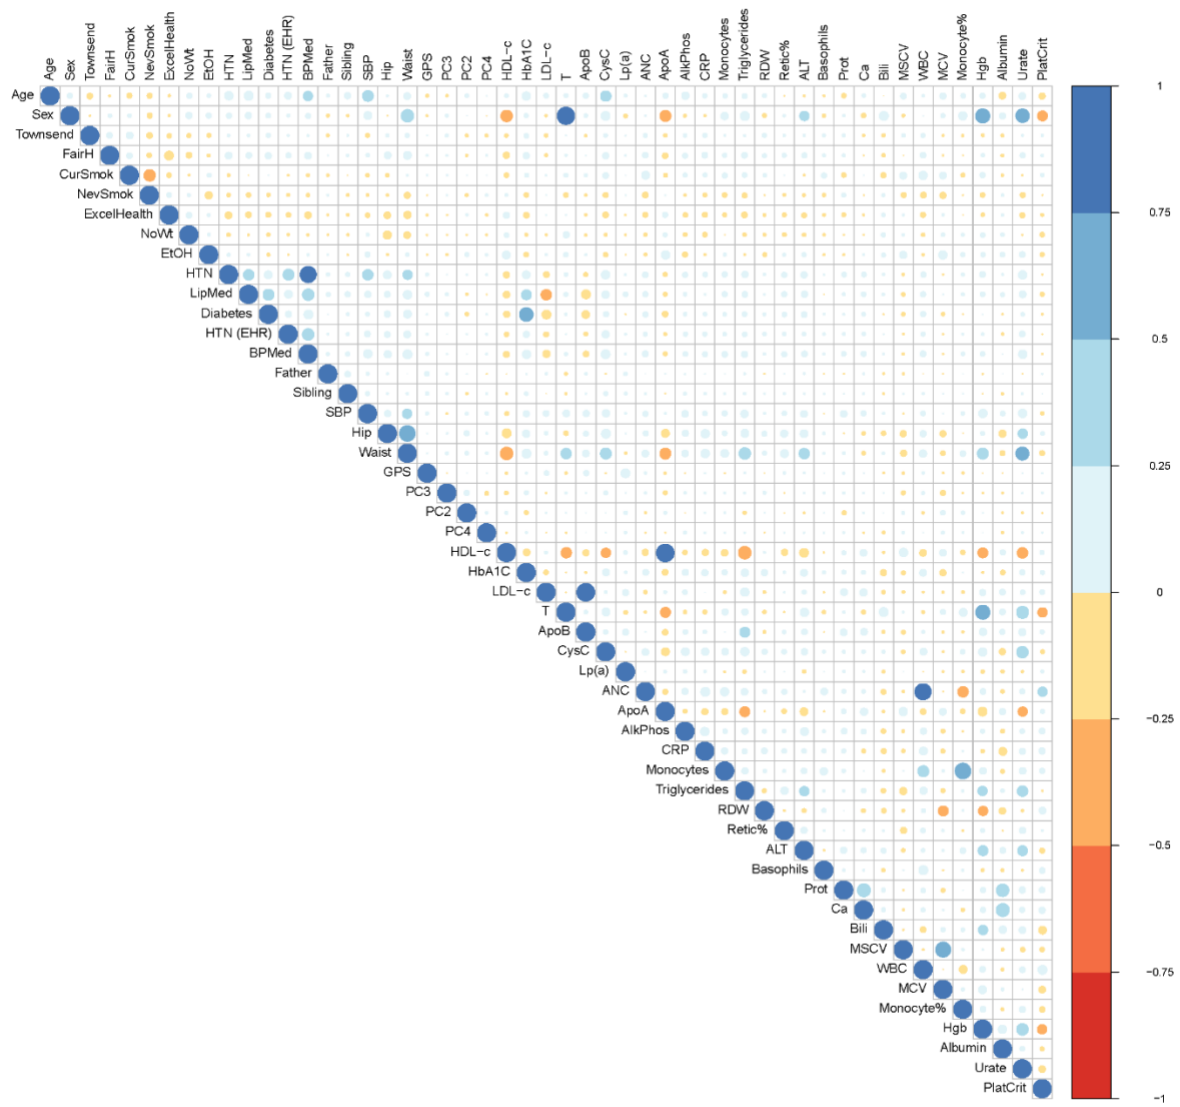

Note that GPS (genome-wide polygenic score for CAD) is not strongly associated with any of the other 50 traits. Five pairs of features had Pearson correlation coefficient magnitude greater than 0.75: Sex/Testosterone, self-reported history of HTN/history of antihypertensive, LDL-c/ApoB, HDL-c/ApoA, Neutrophils/WBC count.

**FIGURE S2** Principal components 1 and 2 of genetic ancestry (left), and principal components 3 and 4 (right) plotted for the analyzed cohort colored by self-identified ethnic groups.

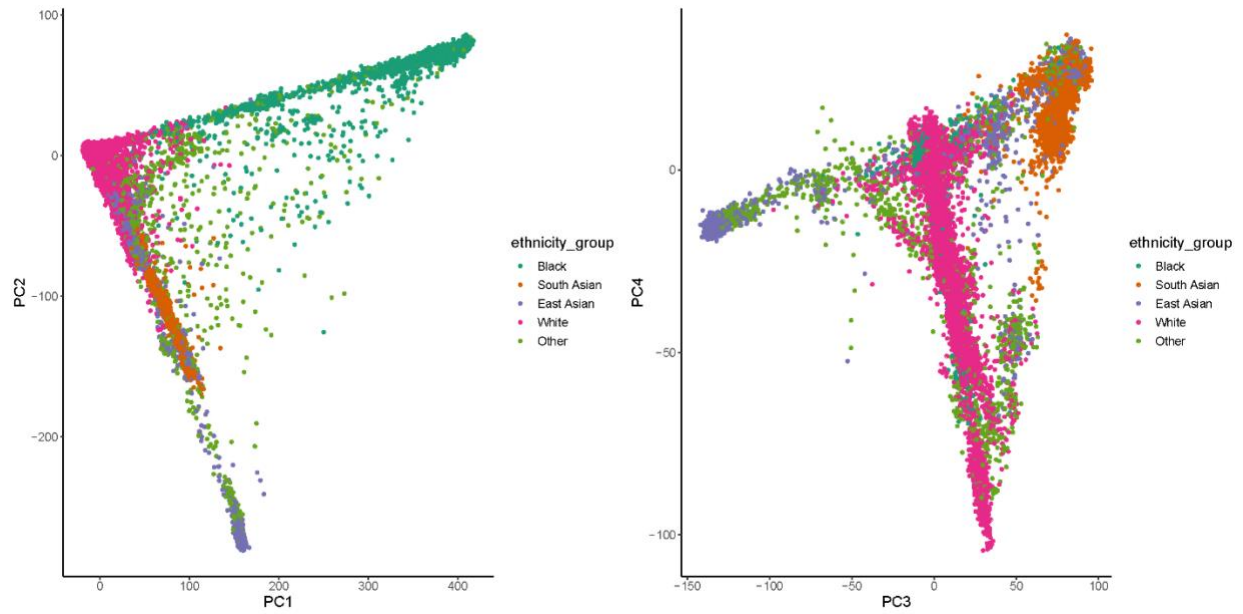

Individuals of South Asian ancestry (orange) are concentrated at the top right of PC3/PC4 plot.

**FIGURE S3** Calibration plots for  $ML4H_{EN-COX}$  in the development (left) and holdout (right) cohorts.

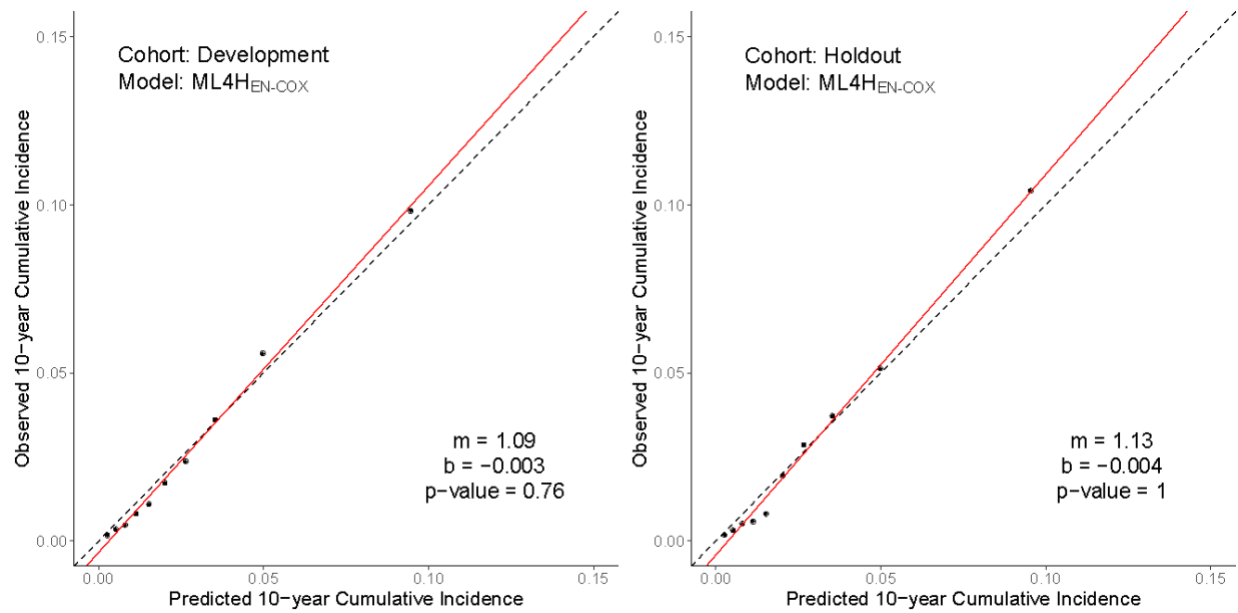

$ML4H_{EN-COX}$  was well-calibrated in the development and holdout cohorts. Slope (m), y-intercept (b), and Hosmer-Lemeshow significance test (p-value) are displayed.



**FIGURE S4** Calibration plots for Framingham risk score (left) and re-calibrated Framingham risk score (right) in the development cohort.

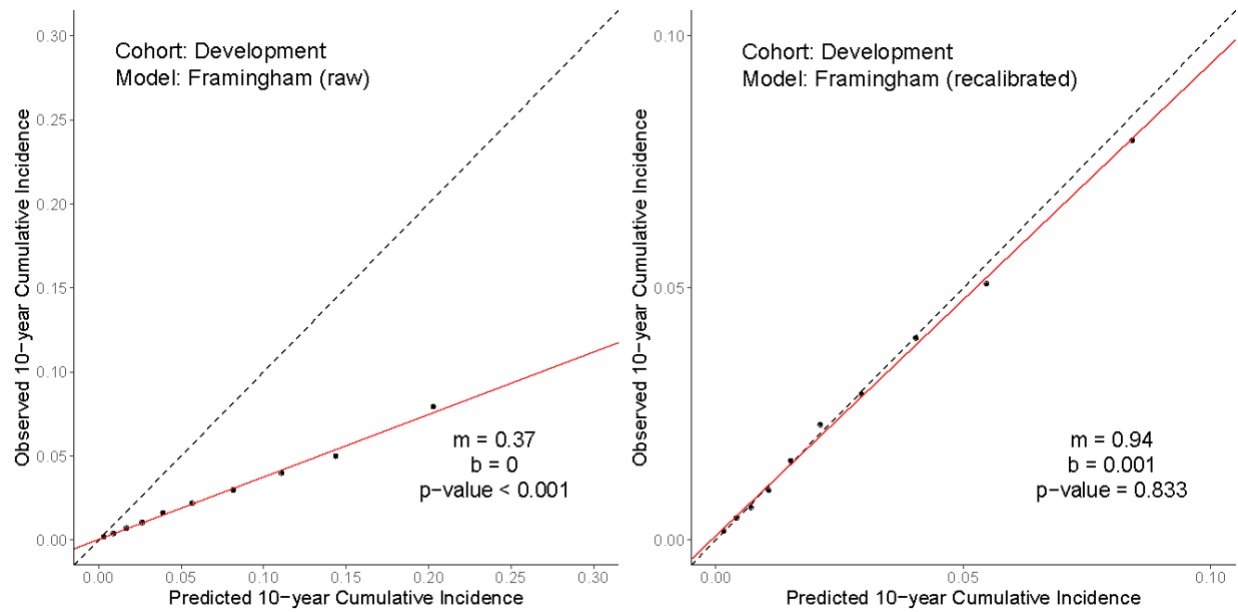

Framingham Risk Score for CAD was successfully recalibrated in the development cohort. Slope ( $m$ ), y-intercept ( $b$ ), and Hosmer-Lemeshow significance test ( $p$ -value) are displayed.

**FIGURE S5** Calibration plots for Pooled Cohort Equations (left) and re-calibrated Pooled Cohort Equations (right) in the development cohort.

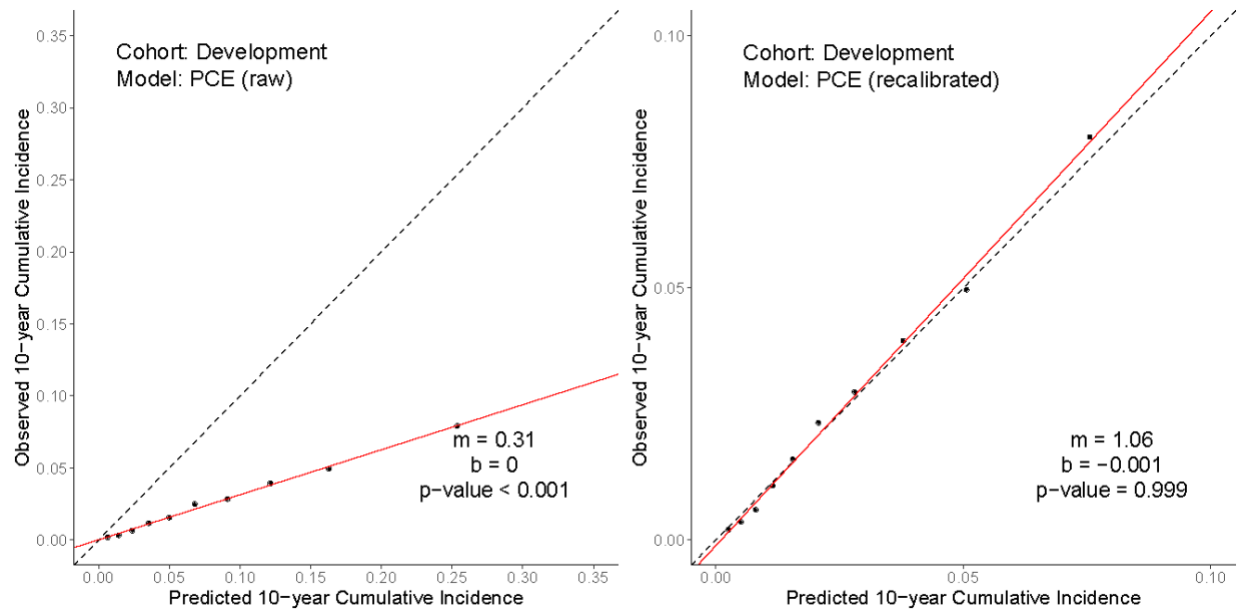

Pooled Cohort Equations predictions were successfully recalibrated in the development cohort. Slope ( $m$ ), y-intercept ( $b$ ), and Hosmer-Lemeshow significance test ( $p$ -value) are displayed.

**FIGURE S6** Calibration plots for QRISK3 (left) and re-calibrated QRISK3 (right) in the development cohort.

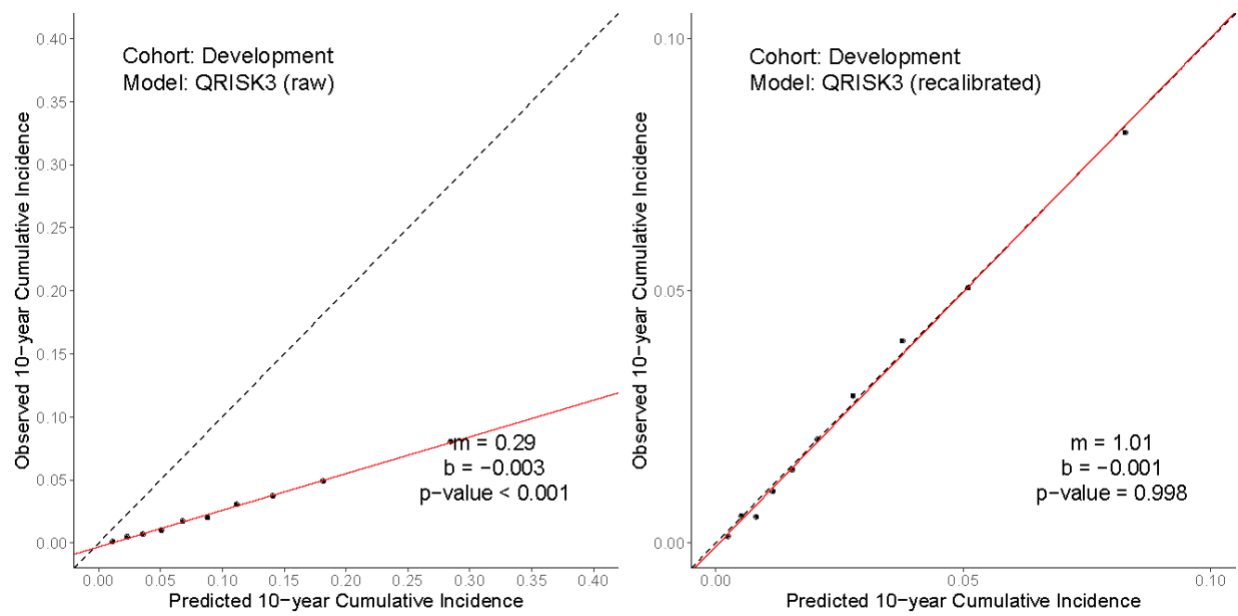

QRISK3 was successfully recalibrated in the development cohort. Slope (m), y-intercept (b), and Hosmer-Lemeshow significance test (p-value) are displayed.

**FIGURE S7** Calibration plots for XGBoost (top left), SimpleCox51 (top right), and SimpleCox20 (bottom left) in the holdout cohort.

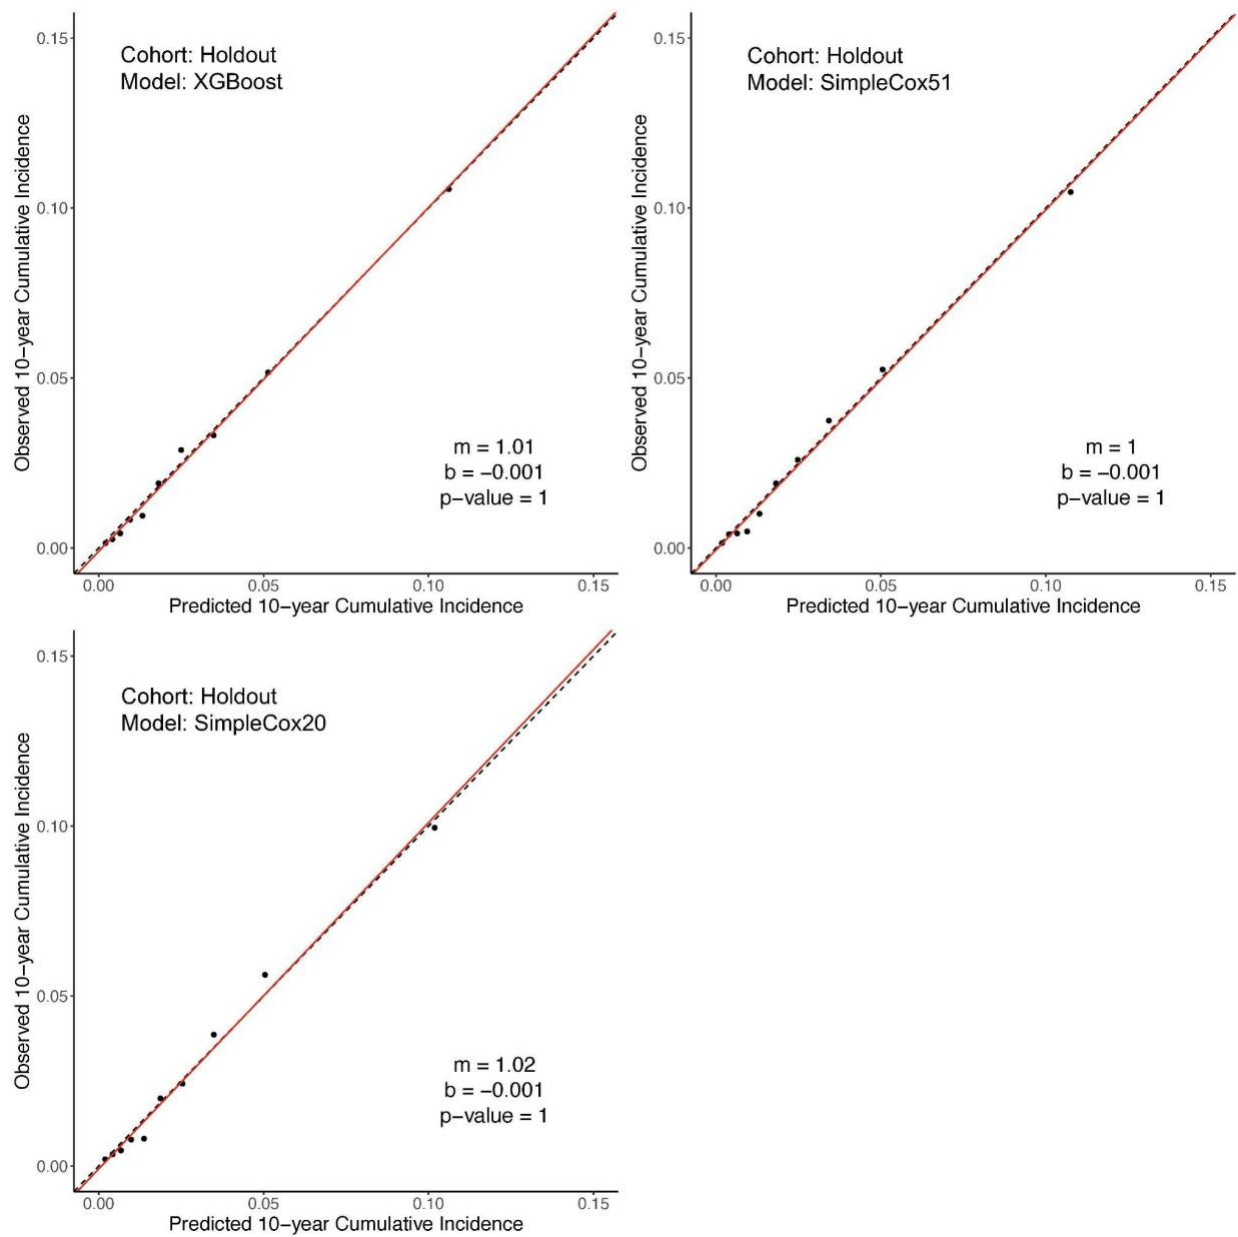

XGBoost, SimpleCox51, and SimpleCox20 models were well-calibrated in the holdout cohort. Slope ( $m$ ), y-intercept ( $b$ ), and Hosmer-Lemeshow significance test ( $p$ -value) are displayed.

**FIGURE S8** Distribution of predicted 10-year risk of CAD for ML4H<sub>EN-COX</sub>, FRS, PCE, QRISK3, SimpleCox51, and XGBoost in the holdout cohort.

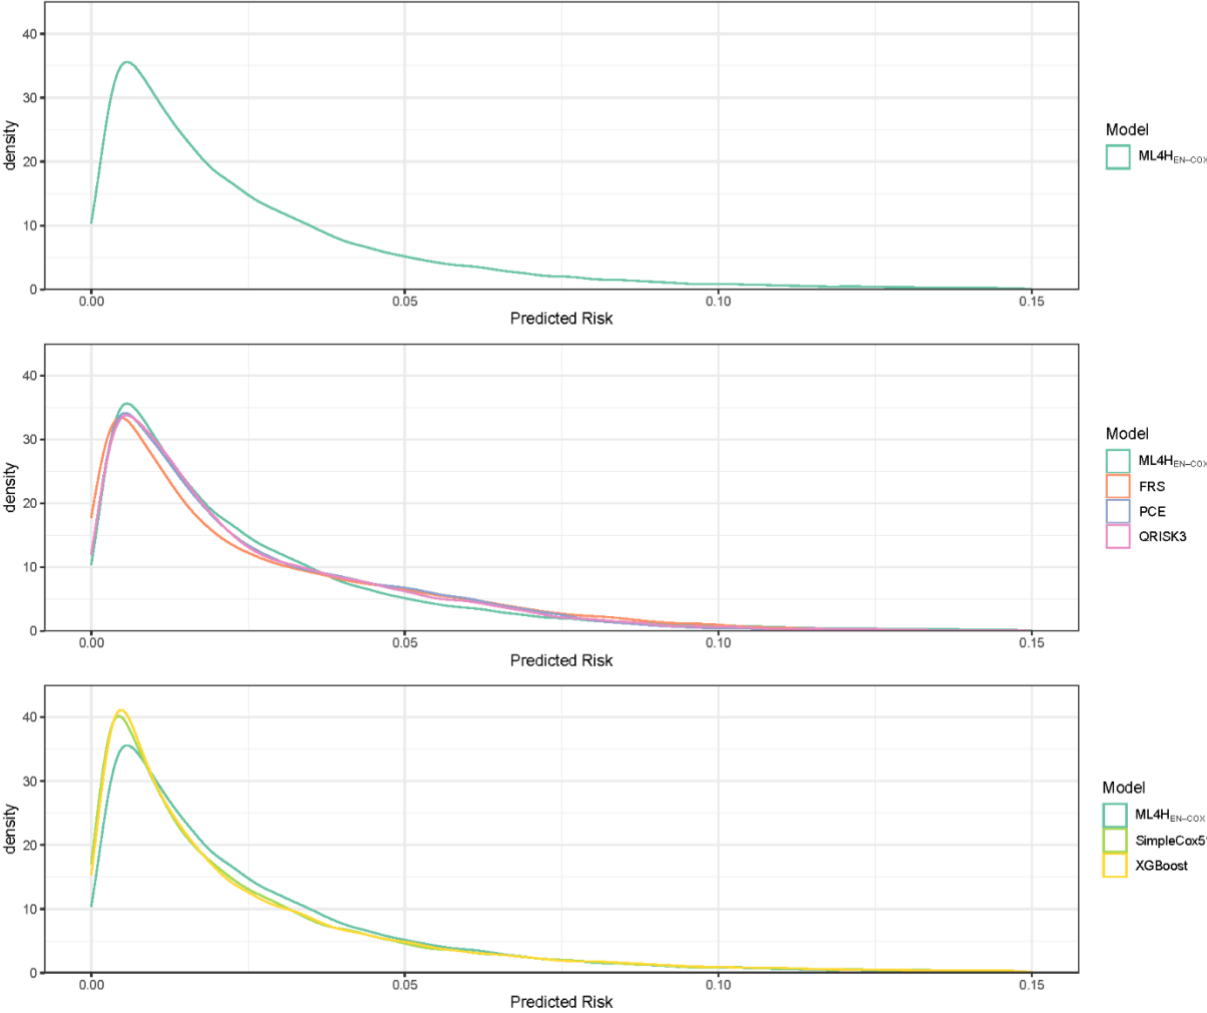

Supplement: mmc1.pdf [file mmc1.pdf]
